# Supplementary material for: Associations of Eating Mode Defined by Dietary Patterns with Cardiometabolic Risk Factors in the Malaysia Lipid Study Population
Source: PubMed Central journal article supplement (PMC7400910; doi:10.3390/nu12072080), 2020-07-14
Supplement: nutrients-12-02080-s001.pdf [file nutrients-12-02080-s001.pdf]

Table S1: Adjusted odds ratio (AOR) for tertile 3 (T3) vs tertile 1 (T1) DP comparisons for selected variables

| Variables                                        | Home Meal*        |       | Chinese Traditional* |        | Plant Food*       |       | Sugar Sweetened Beverages* |       |
|--------------------------------------------------|-------------------|-------|----------------------|--------|-------------------|-------|----------------------------|-------|
|                                                  | AOR (95% CI)      | P     | AOR (95% CI)         | P      | AOR (95% CI)      | P     | AOR (95% CI)               | P     |
| BMI $\geq$ 25 kg/m <sup>2</sup>                  | 0.83 (0.53,1.31)  | 0.424 | 0.82 (0.53,1.26)     | 0.358  | 0.70 (0.45,1.07)  | 0.101 | 2.01 (1.28,3.17)           | 0.003 |
| WC $\geq$ 90 cm (men) or $\geq$ 80 cm (women)    | 1.03 (0.65,1.63)  | 0.906 | 0.66 (0.42,1.03)     | 0.066  | 0.80 (0.51,1.24)  | 0.311 | 1.81 (1.14,2.87)           | 0.013 |
| TC $\geq$ 5.18 mmol/l                            | 0.73 (0.46,1.15)  | 0.172 | 1.10 (0.71,1.71)     | 0.660  | 1.10 (0.72,1.69)  | 0.657 | 1.14 (0.72,1.78)           | 0.579 |
| LDL-C $\geq$ 4.9 mmol/l                          | 0.23 (0.05,1.15)  | 0.071 | 1.57 (0.36,6.89)     | 0.551  | 0.86 (0.20,3.70)  | 0.839 | 2.23 (0.56,8.88)           | 0.603 |
| Small LDL-C particle $\geq$ 600 nmol/l           | 1.06 (0.65,1.72)  | 0.830 | 1.04 (0.65,1.67)     | 0.866  | 1.12 (0.69,1.80)  | 0.652 | 1.69 (1.02,2.79)           | 0.043 |
| Large LDL-C < 450 nmol/l                         | 0.85 (0.55,1.32)  | 0.476 | 0.84 (0.55,1.29)     | 0.436  | 0.82 (0.54,1.25)  | 0.355 | 1.22 (0.79,1.88)           | 0.380 |
| HDL-C < 1.0 mmol/l (men) or < 1.3 mmol/l (women) | 1.19 (0.63,2.23)  | 0.600 | 0.76 (0.42,1.38)     | 0.369  | 0.71 (0.38,1.30)  | 0.264 | 1.64 (0.84,3.18)           | 0.144 |
| TG $\geq$ 1.7 mmol/l                             | 0.73 (0.38,1.38)  | 0.327 | 0.92 (0.50,1.70)     | 0.794  | 0.80 (0.44,1.47)  | 0.477 | 1.94 (1.00,3.77)           | 0.050 |
| TC:HDL-C > 4.5                                   | 0.69 (0.40,1.19)  | 0.184 | 0.67 (0.39,1.14)     | 0.141  | 0.82 (0.48,1.38)  | 0.449 | 1.58 (0.89,2.80)           | 0.119 |
| FPG $\geq$ 5.6 mmol/l                            | 1.11 (0.61,2.00)  | 0.736 | 0.99 (0.55,1.78)     | 0.963  | 0.95 (0.53,1.69)  | 0.850 | 1.46 (0.79,2.68)           | 0.224 |
| HOMA2-IR > 1.4                                   | 0.99 (0.51, 1.92) | 0.972 | 1.31 (0.67, 2.58)    | 0.431  | 0.47 (0.25, 0.91) | 0.025 | 2.63 (1.25, 5.57)          | 0.011 |
| hsCRP $\geq$ 1.0 mg/L                            | 1.57 (1.00,2.45)  | 0.049 | 0.44 (0.28,0.70)     | <0.001 | 0.70 (0.46,1.08)  | 0.111 | 2.21 (1.40,3.50)           | 0.001 |
| SBP > 130 mmHg                                   | 1.25 (0.74,2.12)  | 0.396 | 1.08 (0.64,1.82)     | 0.774  | 1.10 (0.66,1.82)  | 0.717 | 1.68 (0.96,2.93)           | 0.069 |
| DBP > 85 mmHg                                    | 0.72 (0.40,1.32)  | 0.289 | 1.25 (0.69,2.27)     | 0.467  | 0.90 (0.51,1.60)  | 0.728 | 1.42 (0.74,2.74)           | 0.297 |
| MetS (Yes)                                       | 1.23 (0.68,2.23)  | 0.494 | 0.88 (0.49,1.57)     | 0.657  | 0.70 (0.40,1.23)  | 0.218 | 2.78 (1.49,5.22)           | 0.001 |

Footnotes: Data are expressed as odds ratio (95% CI) of T3 against odd ratio of T1 set as 1.0; †Multiple logistic regression test for comparison between tertiles (T3 vs T1) adjusted for age, gender, physical activity level, income, and education level. Abbreviations: AOR, adjusted odds ratio; BMI, body mass index; CI, confidence interval; DBP, diastolic blood pressure; FPG, fasting plasma glucose; HDL, high density lipoprotein; HOMA2-IR, homeostatic model assessment of insulin

resistance; hsCRP, high-sensitivity C-reactive protein; LDL-C, low density lipoprotein; SBP, systolic blood pressure; TC, total cholesterol; TC:HDL-C, total cholesterol high density lipoprotein ratio; TG, triglyceride; WC, waist circumference
